# Supplementary material for: A human huntingtin SNP alters post-translational modification and pathogenic proteolysis of the protein causing Huntington disease
Source: PubMed Central journal article supplement (PMC5970160; doi:10.1038/s41598-018-25903-w), 2018-05-25
Supplement: 41598_2018_25903_MOESM1_ESM.pdf [file 41598_2018_25903_MOESM1_ESM.pdf]

**Supplementary Material:**

**A human huntingtin SNP alters post-translational modification and pathogenic proteolysis of the protein causing Huntington disease**

Martin DDO<sup>1,2\*</sup>, Kay C<sup>1</sup>, Collins JA<sup>1</sup>, Nguyen YT<sup>1</sup>, Slama RA<sup>1</sup>, Hayden MR<sup>1\*</sup>

<sup>1</sup>Centre for Molecular Medicine and Therapeutics, Department of Medical Genetics, University of British Columbia, Vancouver, BC, Canada

<sup>2</sup>Present address: Department of Biology, University of Waterloo

**\*Corresponding authors:**

Dr. Dale Martin

[dale.martin@uwaterloo.ca](mailto:dale.martin@uwaterloo.ca)

Dr. Michael R. Hayden

[mrh@cmmt.ubc.ca](mailto:mrh@cmmt.ubc.ca)

Phone: +1 604 875 3535

Fax: +1 604 875 3819

**Supplemental Table 1** – List of established PTMs<sup>1,2</sup> and novel missense mutations. Amino acid positions refer to NP\_002102.4.

| PTM Position | Amino acid | PTM             | Missense mutation position | Original AA | Effect |
|--------------|------------|-----------------|----------------------------|-------------|--------|
| 3            | T          | phosphorylation |                            |             |        |
| 6            | K          | Sumoylation     |                            |             |        |
| 6            | K          | ubiquitination  |                            |             |        |
| 9            | K          | Sumoylation     |                            |             |        |
| 9            | K          | ubiquitination  |                            |             |        |
| 13           | S          | phosphorylation |                            |             |        |
| 15           | K          | Sumoylation     |                            |             |        |
| 15           | K          | ubiquitination  |                            |             |        |
| 16           | S          | phosphorylation |                            |             |        |
| 81-129       |            | proteolysis     |                            |             |        |
| 104-114      |            | proteolysis     |                            |             |        |
| 124          |            | proteolysis     |                            |             |        |
| 167          | R          | proteolysis     |                            |             |        |
| 205-214      |            | proteolysis     |                            |             |        |
| 214          | C          | palmitoylation  | 233                        | A           | V      |
| 402          | G          | proteolysis     |                            |             |        |
| 421          | S          | phosphorylation |                            |             |        |
| 431          | S          | phosphorylation |                            |             |        |
| 432          | S          | phosphorylation |                            |             |        |
| 434          | S          | phosphorylation |                            |             |        |
| 437          | L          | proteolysis     |                            |             |        |
| 444          | K          | acetylation     |                            |             |        |
| 469          | T          | proteolysis     |                            |             |        |
| 513          | D          | proteolysis     |                            |             |        |
| 536          | S          | proteolysis     |                            |             |        |
| 552          | D          | proteolysis     |                            |             |        |
| 553          | G          | myristoylation  | 553                        | G           | E      |
| 586          | D          | proteolysis     | 627                        | Q           | R      |
|              |            |                 | 698                        | G           | E      |
|              |            |                 | 789                        | V           | M      |
|              |            |                 | 895                        | G           | E      |
|              |            |                 | 996                        | Y           | R      |
|              |            |                 | 1066                       | V           | I      |
|              |            |                 | 1084                       | D           | H      |
|              |            |                 | 1093                       | I           | M      |
|              |            |                 | 1175                       | T           | A      |
| 1181         | S          | phosphorylation |                            |             |        |
| 1201         | S          | phosphorylation | 1262                       | T           | M      |
|              |            |                 | 1387                       | N           | H      |
|              |            |                 | 1710                       | C           | R      |
|              |            |                 | 1722                       | T           | N      |
| 2076         | S          | phosphorylation | 2076                       | S           | P      |
|              |            |                 | 2311                       | Y           | H      |
|              |            |                 | 2446                       | E           | D      |
|              |            |                 | 2645                       | D           | del    |
|              |            |                 | 2647                       | D           | E      |
| 2653         | S          | phosphorylation |                            |             |        |
| 2657         | S          | phosphorylation | 2788                       | V           | I      |

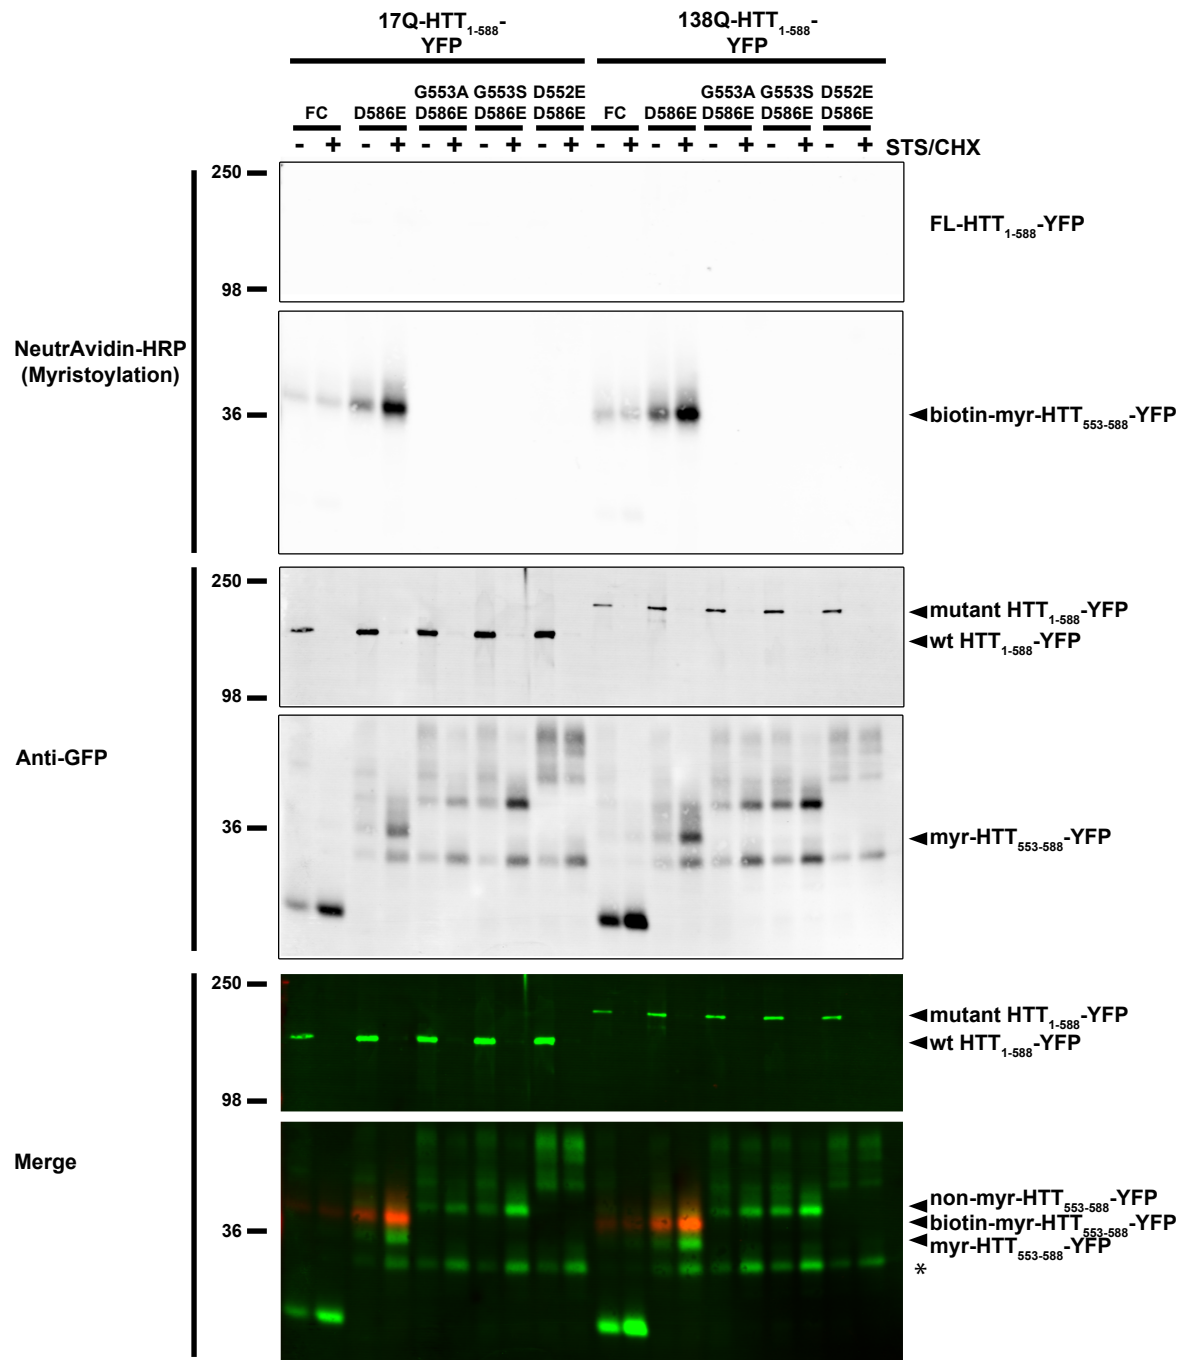

**Supplementary Figure 1 – Orthogonal detection of post-translational myristoylation in HTT<sub>1-588</sub>-YFP.** HTT<sub>1-588</sub>-YFP was immunoprecipitated from HeLa cells incubated with alkyne-myristate. The myristate analog was covalently linked to azido-biotin through Click chemistry for detection. Biotinylated myristoylated cleaved HTT (biotin-myr-HTT<sub>553-588</sub>-YFP) migrated at an intermediate molecular weight between unlabeled myristoylated cleaved HTT (myr-HTT<sub>553-588</sub>-YFP) and non-myristoylated cleaved HTT (non-myr-HTT<sub>553-588</sub>-YFP). Both biotin-myr-HTT<sub>553-588</sub>-YFP and myr-HTT<sub>553-588</sub>-YFP could not be detected when the essential N-terminal glycine was substituted to an alanine (G553A) or serine (G553S). Non-myr-HTT<sub>553-588</sub>-YFP migrates a higher molecular weight than myr-HTT<sub>553-588</sub>-YFP. Cleavage bands correlating to myristoylated and non-myristoylated HTT could not be detected when caspase cleavage was blocked by substituting D552 with glutamate. \*- denotes unknown band.

Uncropped gel from Figure 3B

| STS | FC |   | G553E |   | G553E |   | Mock |   | D586E |   |
|-----|----|---|-------|---|-------|---|------|---|-------|---|
|     | -  | + | -     | + | -     | + | -    | + | -     | + |

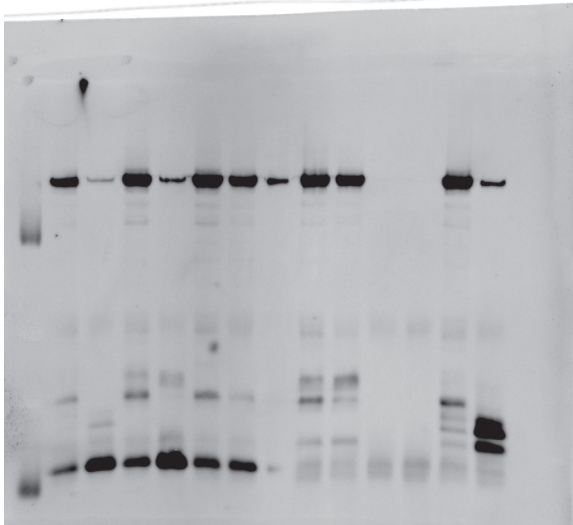

Uncropped gel from Figure 3D

| Edge Control | FC | G553E | G553E/D513E |
|--------------|----|-------|-------------|
|--------------|----|-------|-------------|

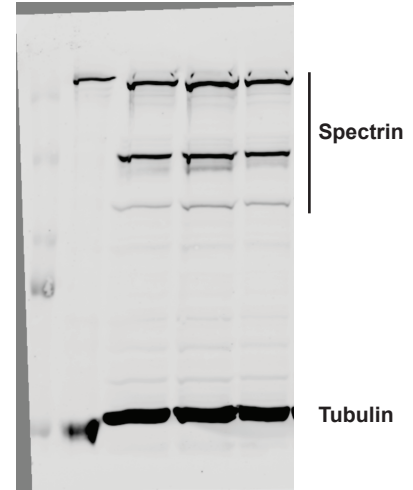

## Supplemental References

1. Ehrnhoefer, D. E., Sutton, L. & Hayden, M. R. Small Changes, Big Impact: Posttranslational Modifications and Function of Huntingtin in Huntington Disease. *Neurosci.* **17**, 475–492 (2011).
2. Martin, D. D. O., Ladha, S., Ehrnhoefer, D. E. & Hayden, M. R. Autophagy in Huntington disease and huntingtin in autophagy. *Trends Neurosci.* **38**, 26–35 (2015).
